# Supplementary material for: Selective complexation of alkaline earth metal ions with nanotubular cyclopeptides: DFT theoretical study
Source: Royal Society of Chemistry journal article supplement (doi:10.1039/c4ra08302d), 2014-12-01
Supplement: c4ra08302d1.pdf [file c4ra08302d1.pdf]

Support information

---

B3LYP

---

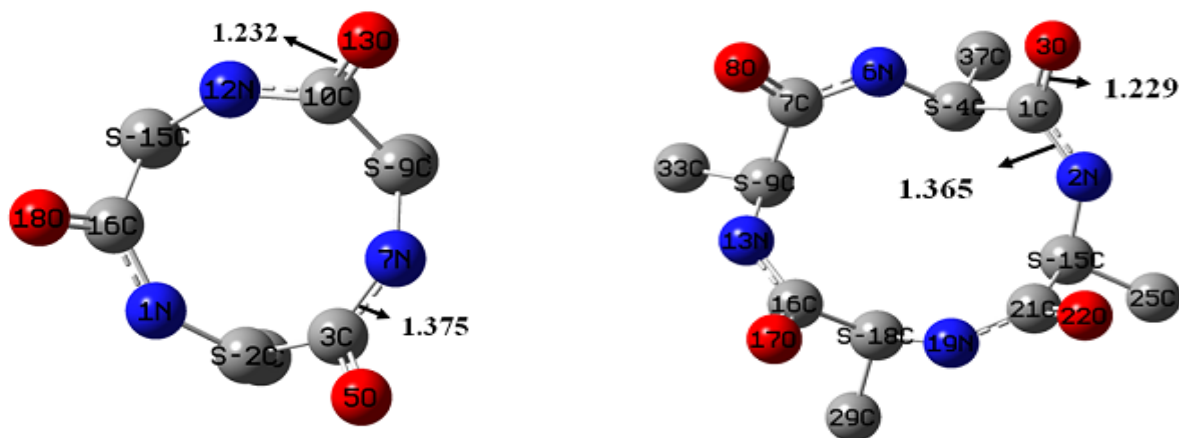

---

**Figure.S1.** The optimized structures of **CyAla3** and **CyAla4** obtained at the B3LYP/6–31+G(d) levels of theory (H atoms are omitted for clarity).

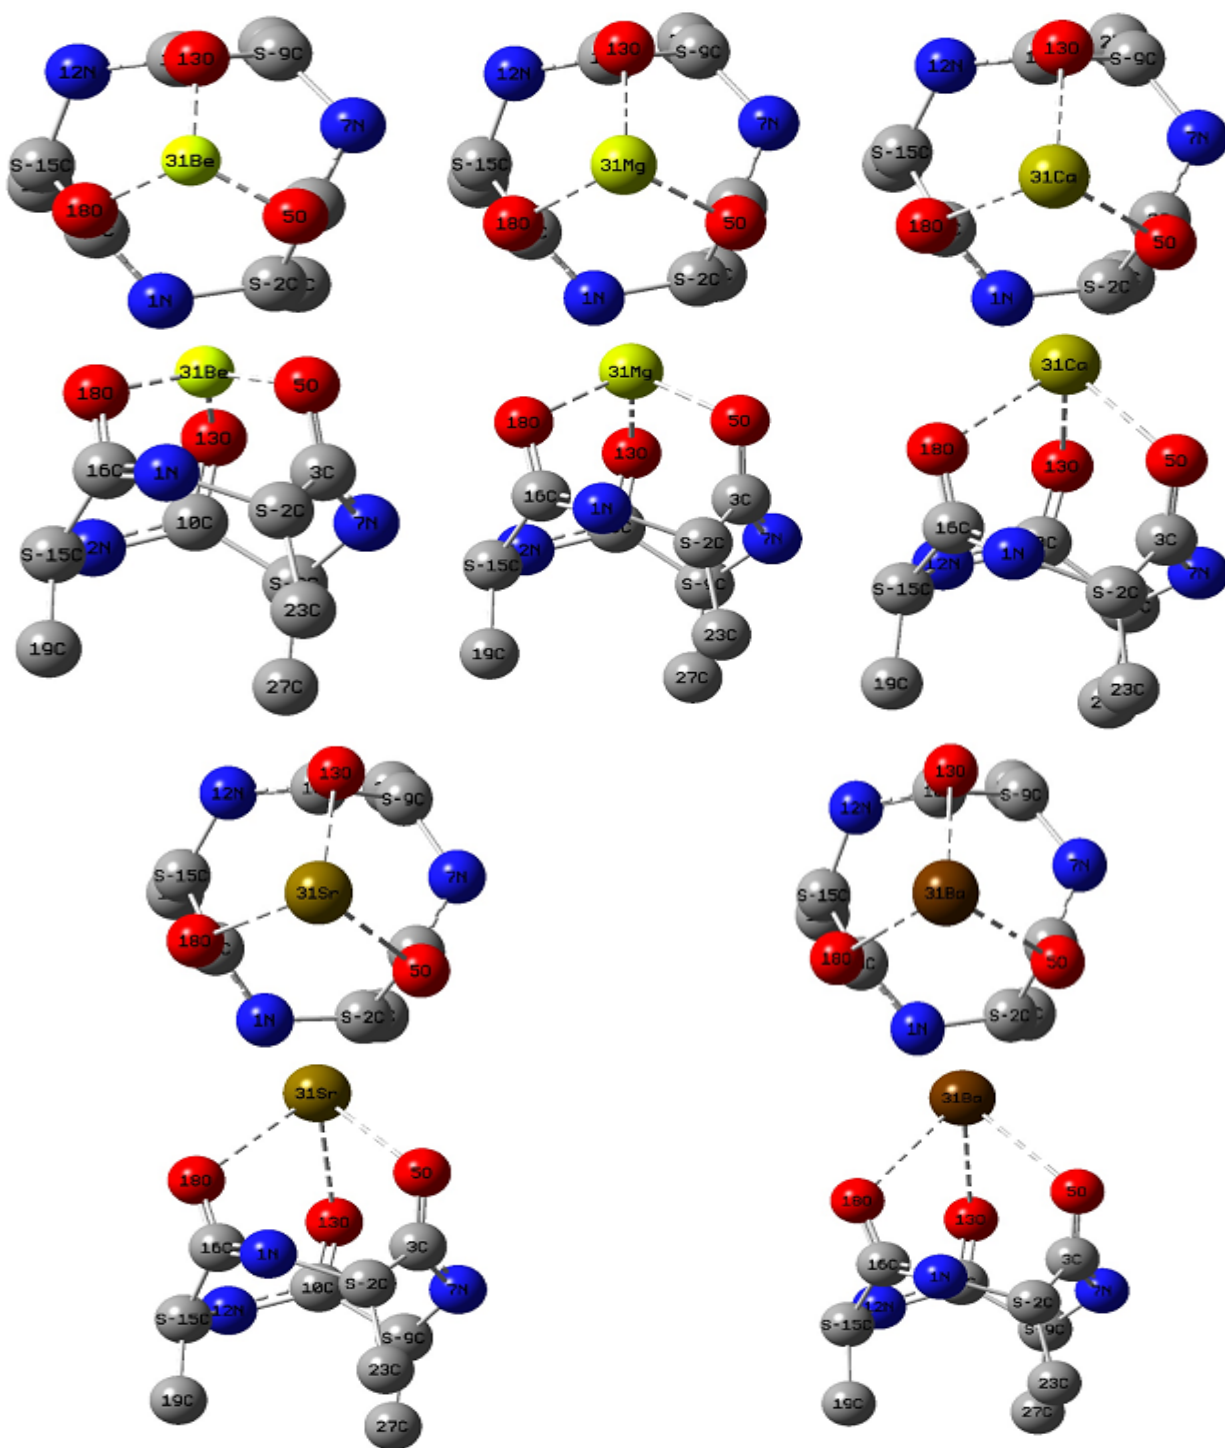

**Figure S.2.** Optimized structures and important geometrical parameters of M/CyAla3 complexes calculated at the B3LYP level of theory, M= Be<sup>2+</sup>, Mg<sup>2+</sup>, Ca<sup>2+</sup>, Sr<sup>2+</sup> and Ba<sup>2+</sup> .



**Table S.1**

The selected geometrical parameters of M/CyAla3 complexes calculated at the B3LYP/6-31+G(d) level of theory.

| M/CyAla3         | C-C(=O) | C-C(H3) | N-H   | $\phi$ 8-7-3-5 | $\phi$ 14-12-10-13 | $\phi$ 6-1-16-18 | C=O   | C(=O)-N |
|------------------|---------|---------|-------|----------------|--------------------|------------------|-------|---------|
| CyAla3           | 1.547   | 1.533   | 1.015 | -4.6           | -4.8               | -4.8             | 1.231 | 1.374   |
| Be <sup>2+</sup> | 1.541   | 1.520   | 1.023 | 23.6           | 23.5               | 23.5             | 1.283 | 1.357   |
| Mg <sup>2+</sup> | 1.545   | 1.522   | 1.021 | 19.6           | 19.6               | 19.6             | 1.269 | 1.361   |
| Ca <sup>2+</sup> | 1.546   | 1.523   | 1.019 | 17.1           | 17.9               | 17.9             | 1.259 | 1.367   |
| Sr <sup>2+</sup> | 1.547   | 1.524   | 1.019 | 16.8           | 16.8               | 16.8             | 1.254 | 1.369   |
| Ba <sup>2+</sup> | 1.547   | 1.525   | 1.019 | 15.7           | 15.7               | 15.6             | 1.252 | 1.371   |

Bond lengths are in Å, dihedral angles in degree (H-N-C=O). All distances are identical in each complexes and in free CyAla3. and are not averaged

**Table S.2**

The selected geometrical parameters of M/CyAla4 complexes calculated at the B3LYP level of theory

| M/CyAla4         | C-C(=O)              | C-(CH3) | N-H   | $\phi$ 12-2-1-3 | $\phi$ 11-6-7-8 | $\phi$ 14-13-16-17 | $\phi$ 20-19-21-22 | C=O                           | C(=O)-N                       |
|------------------|----------------------|---------|-------|-----------------|-----------------|--------------------|--------------------|-------------------------------|-------------------------------|
| CyAla4           | 1.546 <sup>a</sup>   | 1.535   | 1.018 | 6.6             | 4.6             | 6.5                | 4.6                | 1.229                         | 1.365                         |
| Be <sup>2+</sup> | (1.195) <sup>b</sup> | 1.538   | 1.025 | -14.8           | 119.3           | -14.8              | 119.9              | (1.195) <sup>b</sup>          | (1.508) <sup>b</sup>          |
| Mg <sup>2+</sup> | 1.286<br>(1.558)     | 1.533   | 1.025 | -12.0           | 1.5             | -11.1              | 1.52               | 1.286<br>(1.191) <sup>b</sup> | 1.327<br>(1.481) <sup>b</sup> |
| Ca <sup>2+</sup> | 1.531<br>1.545       | 1.539   | 1.022 | -13.9           | -13.9           | -13.9              | -13.9              | 1.261<br>1.250                | 1.337<br>1.366                |
| Sr <sup>2+</sup> | 1.546                | 1.539   | 1.020 | -12.2           | -12.2           | -12.2              | -12.2              | 1.248                         | 1.366                         |
| Ba <sup>2+</sup> | 1.546                | 1.539   | 1.021 | -10.1           | -10.1           | -10.1              | -10.9              | 1.246                         | 1.366                         |

Bond lengths in Å, dihedral angles in degree (H-N-C=O), <sup>a</sup> the average value, <sup>b</sup> the values in parenthesis are the distance between metal ions and faraway atoms.
